# Supplementary material
Source: MDPI journal article supplement (https://www.mdpi.com/2306-5710/9/4/99)
Supplement: s1 [file s1]

Supplementary Table S1. Yeasts present in *Agave* distilled beverages and the most prominent volatile and non-volatile compounds.

| Yeasts                                                                                                                                                                                                                                                                                      | Volatile and non-volatile compounds                                                                                                                                                                                                                                                                                        | Distilled beverage   | <i>Agave species</i>   | (Bibliographic reference)                         |
|---------------------------------------------------------------------------------------------------------------------------------------------------------------------------------------------------------------------------------------------------------------------------------------------|----------------------------------------------------------------------------------------------------------------------------------------------------------------------------------------------------------------------------------------------------------------------------------------------------------------------------|----------------------|------------------------|---------------------------------------------------|
| <i>Candida spp.</i><br><i>Candida magnolia</i><br><i>Hanseniaspora guilliermondii</i><br><i>Hanseniaspora uvarum</i><br><i>Hanseniaspora vineae</i><br><i>Kluyveromyces marxianus</i><br><i>Pichia membranifaciens</i><br><i>Torulaspora delbrueckii</i><br><i>Saccharomyces cerevisiae</i> | acetals (24 different)<br>organic acids (11 different)<br>alcohols (22 different)<br>aldehydes (49 different)<br>furans (14 different)<br>ketones (12 different)<br>phenols (8 different)<br>pyrazines (5 different)<br>sulfur compounds (3 different)<br>terpenes (25 different)<br>miscellaneous compounds (5 different) | Tequila.<br>Jalisco. | <i>A. tequilana.</i>   | Lachance, 1995; Benn & Peppard, 1996; López, 1999 |
| <i>Clavispora lusitaniae</i><br><i>Kluyveromyces marxianus</i><br><i>Pichia fermentans</i><br><i>Saccharomyces cerevisiae</i>                                                                                                                                                               | ethyl acetate<br>methanol<br>ethanol<br>2-butanol<br>n-propanol<br>2-methyl-propanol<br>2,3-methyl-1-butanol<br>ethyl-2-hydroxypropionate<br>acetic acid<br>high alcohol                                                                                                                                                   | Mezcal.<br>S.L.P.    | <i>A. salmiana.</i>    | De León-Rodríguez <i>et al.</i> 2006              |
| <i>Candida spp.</i><br><i>Hanseniaspora spp.</i><br><i>Saccharomyces cerevisiae</i>                                                                                                                                                                                                         | ethanol<br>organic acids<br>fusel oil<br>esters<br>terpenes<br>aldehydes                                                                                                                                                                                                                                                   | Mezcal.<br>Oaxaca.   | <i>A. angustifolia</i> | (Andrade Meneses & Ruíz Terán, 2004)              |
| <i>Candida parapsilosis</i><br><i>Clavispora lusitaniae</i><br><i>Debaryomyces hansenii</i><br><i>Kluyveromyces marxianus</i><br><i>Pichia caribbica</i><br><i>Pichia guilliermondii</i><br><i>Torulaspora delbrueckii</i>                                                                  | ethanol                                                                                                                                                                                                                                                                                                                    | Mezcal.<br>Yucatán.  | <i>A. fourcroydes.</i> | Lappe <i>et al.</i> 2004                          |

|                                                                                                                                                                            |                                                                                                                                                                                                         |                       |                                                                                       |                                         |
|----------------------------------------------------------------------------------------------------------------------------------------------------------------------------|---------------------------------------------------------------------------------------------------------------------------------------------------------------------------------------------------------|-----------------------|---------------------------------------------------------------------------------------|-----------------------------------------|
| <i>Saccharomyces cerevisiae</i>                                                                                                                                            |                                                                                                                                                                                                         |                       |                                                                                       |                                         |
| <i>Clavispora lusitaniae</i><br><i>Kluyveromyces marxianus</i><br><i>Saccharomyces cerevisiae</i>                                                                          | ethanol,<br>organic acids,<br>fusel oil<br>esters<br>aldehydes<br>terpenes (31 different types)<br>2-fenil etanol<br>acetaldehyde<br>ethyl-acetate<br>2-methyl-propanol<br>amil alcoholes<br>1-propanol | Raicilla.<br>Jalisco. | A.<br><i>angustifolia</i> ,<br>A.<br><i>inaequidens</i> ,<br>A.<br><i>maximiliana</i> | Arrizon <i>et al.</i><br>2007           |
| <i>Saccharomyces cerevisiae</i><br><i>Zygosaccharomyces rouxii</i><br><i>Zygosaccharomyces bisporus</i><br><i>Torulaspora delbrueckii</i><br><i>Pichia membranifaciens</i> | ethyl lactate<br>ethyl acetate<br>methanol<br>acetaldehyde<br>isobutanol<br>propanol<br>amyl alcohols<br>ethanol<br>higher alcohols<br>esters                                                           | Mezcal.<br>Oaxaca.    | A.<br><i>angustifolia</i> .                                                           | (Kirchmayr <i>et al.</i> 2017)          |
| <i>Hanseniaspora uvarum</i><br><i>Kluyveromyces marxianus</i><br><i>Saccharomyces cerevisiae</i><br><i>Torulaspora delbrueckii</i>                                         | 2-methyl-1-propanol<br>3-methyl-1-butanol<br>acetic acid<br>1-(2-furanyl)-ethenone<br>Furfural<br>$\alpha$ -terpineol<br>ethyl phenyl acetate<br>phenyl ethyl alcohol<br>esters (15 different types)    | Mezcal.<br>Durango.   | A.<br><i>duranguensis</i> .                                                           | Martell<br>Nevárez <i>et al.</i> , 2011 |

Supplementary Table S2. Data used to generate the heatmap in figure 4.

| Variable                       | Palenque (Categorical and scalar values) * |       |       |       |
|--------------------------------|--------------------------------------------|-------|-------|-------|
|                                | 1                                          | 2     | 3     | 4     |
| Earth oven                     | 0.5                                        | -1.5  | 0.5   | 0.5   |
| Stone oven                     | -0.5                                       | 1.5   | -0.5  | -0.5  |
| Tahona                         | 0.5                                        | -1.5  | 0.5   | 0.5   |
| Shredder                       | -0.5                                       | 1.5   | -0.5  | -0.5  |
| Wooden fermentation container  | 0.5                                        | 0.5   | -1.5  | 0.5   |
| Plastic fermentation container | -0.5                                       | -0.5  | 1.5   | -0.5  |
| Copper distiller               | 0.5                                        | -1.5  | 0.5   | 0.5   |
| Pottery distiller              | -0.5                                       | 1.5   | -0.5  | -0.5  |
| River water                    | 0.5                                        | -1.5  | 0.5   | 0.5   |
| Tap water                      | -0.5                                       | 1.5   | -0.5  | -0.5  |
| <i>Agave angustifolia</i>      | 0.5                                        | 0.5   | -1.5  | 0.5   |
| <i>Agave potatorum</i>         | -0.5                                       | -0.5  | 1.5   | -0.5  |
| pH                             | -0.68                                      | -0.75 | -0.68 | 1.43  |
| Total soluble solutes          | -0.15                                      | 1.44  | -0.78 | -0.50 |
| Temperature                    | -1.08                                      | -0.39 | 0.08  | 1.31  |

\*A categorical and scalar values used in scale function in Rstudio to generate standardized values with a common scale to compare and recognize clustering in the multiple analyzed variables.

Supplementary Table S3. Table where is grouped the corresponding data from the the correlation matrix used to generate the PCA analysis. This table is the result to apply the “corr” R function, originated in the “corr” and the “ggcorrplot” packages. All the data is escalated and to use this table as a matrix, the table present the variable in the first line and in the first column.

|                                | Earth oven | Stone oven | Tahona | Shredder | Wooden fermentation container | Plastic fermentation container | Copper distiller | Pottery distiller |
|--------------------------------|------------|------------|--------|----------|-------------------------------|--------------------------------|------------------|-------------------|
| Earth oven                     | 1.00       | -1.00      | 1.00   | -1.00    | -0.33                         | 0.33                           | 1.00             | -1.00             |
| Stone oven                     | -1.00      | 1.00       | -1.00  | 1.00     | 0.33                          | -0.33                          | -1.00            | 1.00              |
| Tahona                         | 1.00       | -1.00      | 1.00   | -1.00    | -0.33                         | 0.33                           | 1.00             | -1.00             |
| Shredder                       | -1.00      | 1.00       | -1.00  | 1.00     | 0.33                          | -0.33                          | -1.00            | 1.00              |
| Wooden fermentation container  | -0.33      | 0.33       | -0.33  | 0.33     | 1.00                          | -1.00                          | -0.33            | 0.33              |
| Plastic fermentation container | 0.33       | -0.33      | 0.33   | -0.33    | -1.00                         | 1.00                           | 0.33             | -0.33             |
| Copper distiller               | 1.00       | -1.00      | 1.00   | -1.00    | -0.33                         | 0.33                           | 1.00             | -1.00             |
| Pottery distiller              | -1.00      | 1.00       | -1.00  | 1.00     | 0.33                          | -0.33                          | -1.00            | 1.00              |
| River water                    | 1.00       | -1.00      | 1.00   | -1.00    | -0.33                         | 0.33                           | 1.00             | -1.00             |
| Tap water                      | -1.00      | 1.00       | -1.00  | 1.00     | 0.33                          | -0.33                          | -1.00            | 1.00              |
| <i>Agave angustifolia</i>      | -0.33      | 0.33       | -0.33  | 0.33     | 1.00                          | -1.00                          | -0.33            | 0.33              |
| <i>Agave potatorum</i>         | 0.33       | -0.33      | 0.33   | -0.33    | -1.00                         | 1.00                           | 0.33             | -0.33             |
| pH                             | 0.05       | -0.05      | 0.05   | -0.05    | 0.45                          | -0.45                          | 0.05             | -0.05             |
| Total soluble solutes          | -0.96      | 0.96       | -0.97  | 0.97     | 0.53                          | -0.53                          | -0.97            | 0.97              |
| Temperature                    | 0.21       | -0.21      | 0.21   | -0.21    | -0.05                         | 0.05                           | 0.21             | -0.21             |

|                                | River water | Tap water | <i>Agave angustifolia</i> | <i>Agave potatorum</i> | pH    | Total soluble solutes | Temperature |
|--------------------------------|-------------|-----------|---------------------------|------------------------|-------|-----------------------|-------------|
| Earth oven                     | 1.00        | -1.00     | -0.33                     | 0.33                   | 0.05  | -0.97                 | 0.21        |
| Stone oven                     | -1.00       | 1.00      | 0.33                      | -0.33                  | -0.05 | 0.97                  | -0.21       |
| Tahona                         | 1.00        | -1.00     | -0.33                     | 0.33                   | 0.05  | -0.97                 | 0.21        |
| Shredder                       | -1.00       | 1.00      | 0.33                      | -0.33                  | -0.05 | 0.97                  | -0.21       |
| Wooden fermentation container  | -0.33       | 0.33      | 1.00                      | -1.00                  | 0.45  | 0.53                  | -0.05       |
| Plastic fermentation container | 0.33        | -0.33     | -1.00                     | 1.00                   | -0.45 | -0.53                 | 0.05        |
| Copper distiller               | 1.00        | -1.00     | -0.33                     | 0.33                   | 0.05  | -0.97                 | 0.21        |
| Pottery distiller              | -1.00       | 1.00      | 0.33                      | -0.33                  | -0.05 | 0.97                  | -0.21       |
| River water                    | 1.00        | -1.00     | -0.33                     | 0.33                   | 0.05  | -0.97                 | 0.21        |
| Tap water                      | -1.00       | 1.00      | 0.33                      | -0.33                  | -0.05 | 0.97                  | -0.21       |
| <i>Agave angustifolia</i>      | -0.33       | 0.33      | 1.00                      | -1.00                  | 0.45  | 0.53                  | -0.05       |
| <i>Agave potatorum</i>         | 0.33        | -0.33     | -1.00                     | 1.00                   | -0.45 | -0.53                 | 0.05        |
| pH                             | 0.05        | -0.05     | 0.45                      | -0.45                  | 1.00  | -0.07                 | 0.86        |
| Total soluble solutes          | -0.97       | 0.97      | 0.53                      | -0.53                  | -0.07 | 1.00                  | -0.34       |
| Temperature                    | 0.21        | -0.21     | -0.05                     | 0.05                   | 0.86  | -0.34                 | 1.00        |

## References

- [49] Arrizon J., Arizaga J.J., Hernández R.E., Estarrón M., & Gschaedler, A. (2007). Production of volatile compounds in tequila and raicilla musts by different yeasts isolated from Mexican agave beverages. *Hispanic Foods Chemistry and Flavor* (Tunick M. H., & González de Mejía E., eds.), pp. 167–177. American Chemical Society Symposium Series 946, Washington, DC.
- [45] Benn S. M., & Peppard, T. L. (1996). Characterization of tequila flavor by instrumental and sensory analysis. *J. Agric. Food Chem.* 44: 557–566.
- [46] De León-Rodríguez A., González-Hernández L., Barba de la Rosa A., Escalante-Minakata P., & López, M. (2006). Characterization of volatile compounds of mezcal, an ethnic alcoholic beverage obtained from *Agave salmiana*. *J. Agric. Food Chem.* 54: 1337–1341.
- [44] Kirchmayr M. R., Segura-García L. E., Lappe-Oliveras P., Moreno-Terrazas R., De la Rosa M., & Gschaedler Mathis, A. (2017). Impact of environmental conditions and process modifications on microbial diversity, fermentation efficiency and chemical profile during the fermentation of Mezcal in Oaxaca. *LWT - Food Science and Technology* 79: 160–169.
- [34] Lachance, M.A. (1995). Yeast communities in a natural tequila fermentation. *Antonie van Leeuwenhoek* 68: 151–160.

- [7]Lappe-Oliveras P., Moreno-Terrazas R., Arrizón-Gaviño J., Herrera-Suárez T., García-Mendoza A., & Gschaedler-Mathis, A. (2008). Yeasts associated with the production of Mexican alcoholic non distilled and distilled *Agave* beverages. *FEMS Yeast Research* 8(7): 1037–1052.
- [35]López, M. G. (1999). Tequila aroma. *Flavor Chemistry of Ethnic Foods* (Shahidi F & Ho CT, eds), pp. 211–217. Kluwer Academic/Plenum Publishers, New York.
- [50]Martell Nevárez M. A., Córdova Gurrola E. E., López Miranda J., Soto Cruz N. O, López Pérez M. G., Rutiaga Quiñones, O. M. 2011. Effect of fermentation temperature on chemical composition of mescals made from *Agave duranguensis* juice with different native yeast genera. *African Journal of Microbiology Research* 4(22): 3669-3676.
- [47]Andrade Meneses O. E., & Ruiz Terán, F. (2004). Study of yeast populations in a mezcal fermentation. Poster PF 17, p. 157. 11th International Congress on Yeasts. Yeasts in Science and Technology, The Quest for Sustainable Development. Rio de Janeiro, Brazil.
- [48]Lappe P., Ulloa M., Arce Rocha G., Cáceres Farfán M., Tapia Tussel R., Pérez Brito D., & Larque, A. (2004). Isolation and identification of the mycobiota present in *Agave fourcroydes*. Poster PE 11, p. 175, 11th International Congress on Yeasts. Yeasts in Science and Technology, The Quest for Sustainable Development. Rio de Janeiro, Brazil.
- [19]RStudio Team, RStudio: Integrated Development for R. RStudio, PBC, Boston, MA. URL <http://www.rstudio.com/>, 2020.
- [20]Kassambara, A. Practical guide to principal component methods in R. USA: CreateSpace Independent Publishing Platform, 2017.
- [21]R Core Team, Language and Environment for Statistical Computing, R Foundation for Statistical Computing, Vienna, Austria, 2021.
